# Supplementary material for: Effects of Hydrogen Peroxide Produced by Catechins on the Aroma of Tea Beverages
Source: MDPI journal article supplement (doi:10.3390/foods11091273), 2022-04-27
Supplement: s1 [file s1]

**Effects of Hydrogen Peroxide Produced by Catechins on the Aroma of Tea  
Beverages**

Jieqiong Wang <sup>1,2</sup>, Ying Gao <sup>1</sup>, Dan Long <sup>3</sup>, Junfeng Yin <sup>1</sup>, Liang Zeng <sup>2,\*</sup>,

Yanqun Xu <sup>4</sup>, Yongquan Xu <sup>1\*\*</sup>

<sup>1</sup> Tea Research Institute Chinese Academy of Agricultural Sciences, Key Laboratory of Tea Biology and Resources Utilization, Ministry of Agriculture, 9 South Meiling Road, Hangzhou 310008, China.

<sup>2</sup> College of Food Science, Southwest University, Chongqing 400715, China

<sup>3</sup> Food Research Institute, Hongsheng Beverage Group, Zhejiang, 311200, China.

<sup>4</sup> College of Biosystems Engineering and Food Science, Ningbo Research Institute, Zhejiang University, Zhejiang, 315100, China.

**Corresponding Authors**

**\*\*Yong-Quan Xu**, Tel: +86-571-86650594. Fax: +86 571 86650056. Email: [yqx33@126.com](mailto:yqx33@126.com).

**\*Liang Zeng**, Tel: +86-023-68250374. Fax: +86 023 68251743. Email: [zengliangbaby@126.com](mailto:zengliangbaby@126.com).

**Table S1.** Preparation of tea samples.

| Different conditions                 | Sample treatment process                                                                                                                                                                                                                                                                                                                                                                                                                                                                                                                 |
|--------------------------------------|------------------------------------------------------------------------------------------------------------------------------------------------------------------------------------------------------------------------------------------------------------------------------------------------------------------------------------------------------------------------------------------------------------------------------------------------------------------------------------------------------------------------------------------|
| <b>catechin reaction system</b>      |                                                                                                                                                                                                                                                                                                                                                                                                                                                                                                                                          |
| (1) Catechins species                | EGCG, EC, ECG, EGC and GA monomer powder (purity $\geq 96\%$ ) were dissolved in pure water and prepared into a solution with a concentration of 100 $\mu\text{M}$ .                                                                                                                                                                                                                                                                                                                                                                     |
| (2) Catechin concentration           | Prepare EGCG solutions with concentrations of 5, 10, 20, 50, 100, 200, 300, 400, 500, 700, 900, 1000 $\mu\text{M}$ respectively.                                                                                                                                                                                                                                                                                                                                                                                                         |
| (3) Heat treatment time              | the EGCG solutions with concentrations of 100, 500 $\mu\text{M}$ were heated at 50 $^{\circ}\text{C}$ for 0, 6, 12, 16, 24, and 48 h, respectively.                                                                                                                                                                                                                                                                                                                                                                                      |
| (4) Heat treatment temperature       | the EGCG solution with a concentration of 100 $\mu\text{M}$ was heated in a water bath at 25 $^{\circ}\text{C}$ for 0, 10, 24, 48, 96, 144, 192, 240, 288 h; at 37 $^{\circ}\text{C}$ for 0, 6, 12, 16, 24, 48, 72, 120 h; at 50 $^{\circ}\text{C}$ for 0, 0.5, 1, 2, 4, 6, 8, 10, 12 h, respectively; at 70 $^{\circ}\text{C}$ for 0, 0.5, 1, 2, 3, 4, 5, 6, 7 h respectively; at 90 $^{\circ}\text{C}$ for 0, 0.25, 0.5, 1, 1.5, 2, 2.5, 3, 3.5 h respectively.                                                                        |
| (5) pH                               | the EGCG was dissolved in the prepared disodium hydrogen phosphate-citrate buffer (0.1M citric acid and 0.2M disodium hydrogen phosphate) of pH 5.6, 6.2, 6.8, 7.4 and 8.0 to form a 100 $\mu\text{M}$ buffer solution of EGCG. After that, 4 mL of the prepared solution (1-5) was placed in a 15 mL centrifuge tube, in a water bath at 50 $^{\circ}\text{C}$ (except 4) for 2 h (except 3), followed by immediate removal and cooling to room temperature in an ice water bath, and the hydrogen peroxide yield was to be determined. |
| (6) metal ions                       | prepare aqueous solutions of $\text{FeSO}_4$ , $\text{CuSO}_4$ , KCl with concentrations of 2, 5, 10 $\mu\text{M}$ , respectively.                                                                                                                                                                                                                                                                                                                                                                                                       |
| (7) Antioxidants                     | 0.01% and 0.02% of antioxidants VC, BHA, BHT, TBHQ were prepared. After that, 6-7 were mixed with aqueous EGCG solution with a concentration of 100 $\mu\text{M}$ in the ratio of 1:10 (i.e., 0.4 mL metal ion solution: 4 mL EGCG solution), 4.4 mL of the mixture was placed in a 15 mL centrifuge tube, 50 $^{\circ}\text{C}$ water bath for 2 h, and then removed for determination.                                                                                                                                                 |
| <b>linalool-EGCG reaction system</b> |                                                                                                                                                                                                                                                                                                                                                                                                                                                                                                                                          |
| (8) water bath time                  | 100 mg/L of linalool was mixed with EGCG at                                                                                                                                                                                                                                                                                                                                                                                                                                                                                              |

(9) metal

the same concentration in the ratio of 1:1 (i.e., 2 mL:2 mL), the mixture was water bath at 50, 90 °C for 1 h (unheated CK was used as control). 100 mg/L of linalool was mixed with EGCG at the same concentration in the ratio of 1:1 (i.e., 2 mL:2 mL), the above mixture was mixed with 5  $\mu$ M of FeSO<sub>4</sub>, CuSO<sub>4</sub> solution for a second time and water bath at 70 °C for 1 h. Afterwards, the water bath was (8-9) was removed and the ice water bath was cooled to room temperature, and the hydrogen peroxide yield was to be measured.

---

**hydrogen peroxide-linalool reaction system**

(10) mixing ratio

A mixture of hydrogen peroxide (100 mM) and linalool (10 mg/L) was prepared in the mixing ratio of 1:3, 1:1, 3:1 (i.e., 1 mL: 3 mL, 2 mL: 2 mL, 3 mL: 1 mL) in a water bath at 70°C for 1 h.

(11) linalool concentration

a mixture of hydrogen peroxide (100 mM) and different concentrations ((10, 50, 100 mg/L) of linalool was prepared in the ratio of 1:1 mixture, 70 °C water bath for 1 h.

(12) water bath time

Hydrogen peroxide (100 mM) and linalool (10 mg/L) were mixed in the ratio of 1:1 and bathed in water at 70°C for 1, 2 and 3 h, respectively.

(13) water bath temperature

Hydrogen peroxide (100 mM) was mixed with linalool (10 mg/L) in the ratio of 1:1 and then bathed for 1h at 50°C and 90°C.

(14) metal

5  $\mu$ M of FeSO<sub>4</sub> and CuSO<sub>4</sub> were added to a solution of hydrogen peroxide (100 mM) mixed with linalool (10 mg/L) in the ratio of 1:1, and a water bath at 70°C for 1 h. After that, the above samples were (10-14) were removed and cooled to room temperature in an ice-water bath, and the linalool concentrations were to be tested.

---

**Table S2.** Changes in the content of major catechins produced by the EGCG solution system during heat treatment (Unit: mg/L, different lowercase letters indicate significant differences between mean values the same column ( $p < 0.05$ ), the same below).

| Heat treatment time<br>(h) | 100 $\mu$ M EGCG Solution        |                                  |                                 |                                 | 500 $\mu$ M EGCG Solution         |                                  |                                 |                                |
|----------------------------|----------------------------------|----------------------------------|---------------------------------|---------------------------------|-----------------------------------|----------------------------------|---------------------------------|--------------------------------|
|                            | EGCG                             | GCG                              | ECG                             | GA                              | EGCG                              | GCG                              | ECG                             | GA                             |
| <b>70 °C</b>               |                                  |                                  |                                 |                                 |                                   |                                  |                                 |                                |
| 0                          | 32.271 $\pm$ 2.620 <sup>a</sup>  | 0.000 $\pm$ 0.000 <sup>e</sup>   | 1.139 $\pm$ 0.078 <sup>a</sup>  | 0.044 $\pm$ 0.003 <sup>d</sup>  | 183.178 $\pm$ 2.238 <sup>a</sup>  | 0.000 $\pm$ 0.000 <sup>g</sup>   | 6.979 $\pm$ 0.003 <sup>a</sup>  | 0.173 $\pm$ 0.010 <sup>g</sup> |
| 0.5                        | 28.050 $\pm$ 1.279 <sup>b</sup>  | 0.000 $\pm$ 0.000 <sup>e</sup>   | 1.258 $\pm$ 0.002 <sup>a</sup>  | 0.179 $\pm$ 0.045 <sup>cd</sup> | 172.471 $\pm$ 0.991 <sup>a</sup>  | 3.268 $\pm$ 0.261 <sup>f</sup>   | 6.964 $\pm$ 0.027 <sup>a</sup>  | 0.322 $\pm$ 0.036 <sup>f</sup> |
| 1                          | 26.246 $\pm$ 1.164 <sup>b</sup>  | 1.874 $\pm$ 0.277 <sup>d</sup>   | 1.287 $\pm$ 0.022 <sup>a</sup>  | 0.318 $\pm$ 0.066 <sup>c</sup>  | 169.551 $\pm$ 2.508 <sup>b</sup>  | 5.412 $\pm$ 0.439 <sup>e</sup>   | 6.930 $\pm$ 0.010 <sup>a</sup>  | 0.459 $\pm$ 0.045 <sup>e</sup> |
| 2                          | 21.985 $\pm$ 1.568 <sup>c</sup>  | 2.798 $\pm$ 0.250 <sup>c</sup>   | 1.186 $\pm$ 0.032 <sup>a</sup>  | 0.568 $\pm$ 0.061 <sup>b</sup>  | 160.330 $\pm$ 1.372 <sup>bc</sup> | 7.730 $\pm$ 1.389 <sup>d</sup>   | 6.681 $\pm$ 0.076 <sup>b</sup>  | 0.719 $\pm$ 0.085 <sup>d</sup> |
| 3                          | 20.383 $\pm$ 2.194 <sup>cd</sup> | 3.285 $\pm$ 0.197 <sup>b</sup>   | 1.187 $\pm$ 0.016 <sup>a</sup>  | 0.706 $\pm$ 0.101 <sup>b</sup>  | 156.666 $\pm$ 3.070 <sup>c</sup>  | 9.904 $\pm$ 0.506 <sup>c</sup>   | 6.651 $\pm$ 0.013 <sup>b</sup>  | 0.883 $\pm$ 0.050 <sup>c</sup> |
| 4                          | 17.315 $\pm$ 3.222 <sup>d</sup>  | 3.967 $\pm$ 0.298 <sup>a</sup>   | 1.193 $\pm$ 0.122 <sup>a</sup>  | 0.921 $\pm$ 0.195 <sup>a</sup>  | 153.959 $\pm$ 2.782 <sup>d</sup>  | 11.195 $\pm$ 0.708 <sup>b</sup>  | 6.719 $\pm$ 0.005 <sup>b</sup>  | 1.114 $\pm$ 0.113 <sup>b</sup> |
| 5                          | 18.238 $\pm$ 0.594 <sup>d</sup>  | 3.880 $\pm$ 0.473 <sup>a</sup>   | 1.189 $\pm$ 0.026 <sup>a</sup>  | 0.923 $\pm$ 0.043 <sup>a</sup>  | 147.813 $\pm$ 3.014 <sup>e</sup>  | 12.818 $\pm$ 0.871 <sup>a</sup>  | 6.632 $\pm$ 0.079 <sup>b</sup>  | 1.304 $\pm$ 0.104 <sup>a</sup> |
| <b>90 °C</b>               |                                  |                                  |                                 |                                 |                                   |                                  |                                 |                                |
| 0                          | 32.271 $\pm$ 2.620 <sup>a</sup>  | 0.000 $\pm$ 0.000 <sup>f</sup>   | 1.139 $\pm$ 0.078 <sup>a</sup>  | 0.044 $\pm$ 0.003 <sup>g</sup>  | 183.178 $\pm$ 2.238 <sup>a</sup>  | 0.000 $\pm$ 0.000 <sup>e</sup>   | 6.979 $\pm$ 0.003 <sup>a</sup>  | 0.173 $\pm$ 0.010 <sup>f</sup> |
| 0.25                       | 25.606 $\pm$ 0.718 <sup>b</sup>  | 3.543 $\pm$ 0.335 <sup>e</sup>   | 1.223 $\pm$ 0.001 <sup>a</sup>  | 0.413 $\pm$ 0.054 <sup>f</sup>  | 165.725 $\pm$ 5.224 <sup>b</sup>  | 8.976 $\pm$ 1.167 <sup>d</sup>   | 6.988 $\pm$ 0.217 <sup>a</sup>  | 0.542 $\pm$ 0.101 <sup>e</sup> |
| 0.5                        | 22.571 $\pm$ 0.206 <sup>c</sup>  | 6.013 $\pm$ 0.599 <sup>d</sup>   | 1.147 $\pm$ 0.021 <sup>a</sup>  | 0.654 $\pm$ 0.021 <sup>e</sup>  | 155.431 $\pm$ 7.205 <sup>c</sup>  | 17.281 $\pm$ 2.981 <sup>c</sup>  | 6.837 $\pm$ 0.170 <sup>ab</sup> | 0.928 $\pm$ 0.207 <sup>d</sup> |
| 1                          | 17.687 $\pm$ 0.720 <sup>d</sup>  | 8.531 $\pm$ 0.242 <sup>c</sup>   | 1.042 $\pm$ 0.010 <sup>b</sup>  | 0.978 $\pm$ 0.024 <sup>d</sup>  | 148.862 $\pm$ 3.138 <sup>c</sup>  | 26.278 $\pm$ 1.514 <sup>b</sup>  | 6.555 $\pm$ 0.051 <sup>bc</sup> | 1.293 $\pm$ 0.164 <sup>c</sup> |
| 1.5                        | 15.744 $\pm$ 1.108 <sup>de</sup> | 9.967 $\pm$ 0.796 <sup>b</sup>   | 0.980 $\pm$ 0.012 <sup>bc</sup> | 1.132 $\pm$ 0.117 <sup>c</sup>  | 139.535 $\pm$ 1.695 <sup>d</sup>  | 31.284 $\pm$ 1.056 <sup>ab</sup> | 6.290 $\pm$ 0.118 <sup>c</sup>  | 1.693 $\pm$ 0.050 <sup>b</sup> |
| 2                          | 14.192 $\pm$ 1.046 <sup>ef</sup> | 10.572 $\pm$ 1.034 <sup>ab</sup> | 0.955 $\pm$ 0.040 <sup>cd</sup> | 1.336 $\pm$ 0.070 <sup>b</sup>  | 133.693 $\pm$ 3.863 <sup>de</sup> | 34.142 $\pm$ 5.587 <sup>a</sup>  | 6.371 $\pm$ 0.152 <sup>c</sup>  | 2.062 $\pm$ 0.350 <sup>a</sup> |
| 2.5                        | 12.163 $\pm$ 0.515 <sup>f</sup>  | 11.385 $\pm$ 1.363 <sup>a</sup>  | 0.878 $\pm$ 0.013 <sup>d</sup>  | 1.545 $\pm$ 0.091 <sup>a</sup>  | 129.308 $\pm$ 1.434 <sup>e</sup>  | 35.289 $\pm$ 6.471 <sup>a</sup>  | 6.288 $\pm$ 0.088 <sup>c</sup>  | 2.280 $\pm$ 0.169 <sup>a</sup> |

**Table S3.** EGCG content and the amount of hydrogen peroxide produced in green tea with different baking levels (SST: steamed tea leaves; SBST: steamed baked spring tea leaves; SAT: steamed autumn tea leaves; SLBAT: steamed and lightly baked autumn tea leaves; SBAT: steamed and baked autumn tea leaves; PST: pan-fired spring tea leaves; PBST: pan-fired and baked spring tea leaves).

| Samples | EGCG                     | Concentration of H <sub>2</sub> O <sub>2</sub> (μmol/L) |
|---------|--------------------------|---------------------------------------------------------|
| SST     | 0.874±0.000 <sup>b</sup> | 24.250 ± 0.50 <sup>d</sup>                              |
| SBST    | 0.230±0.000 <sup>g</sup> | 48.250 ± 0.250 <sup>a</sup>                             |
| SAT     | 0.707±0.000 <sup>d</sup> | 26.125 ± 0.375 <sup>c</sup>                             |
| SLBAT   | 0.491±0.000 <sup>e</sup> | 33.125 ± 0.375 <sup>b</sup>                             |
| SBAT    | 0.240±0.000 <sup>f</sup> | 48.625 ± 0.375 <sup>a</sup>                             |
| PST     | 1.257±0.001 <sup>a</sup> | 2.875 ± 0.125 <sup>f</sup>                              |
| PBST    | 0.829±0.000 <sup>c</sup> | 14.375 ± 0.125 <sup>e</sup>                             |

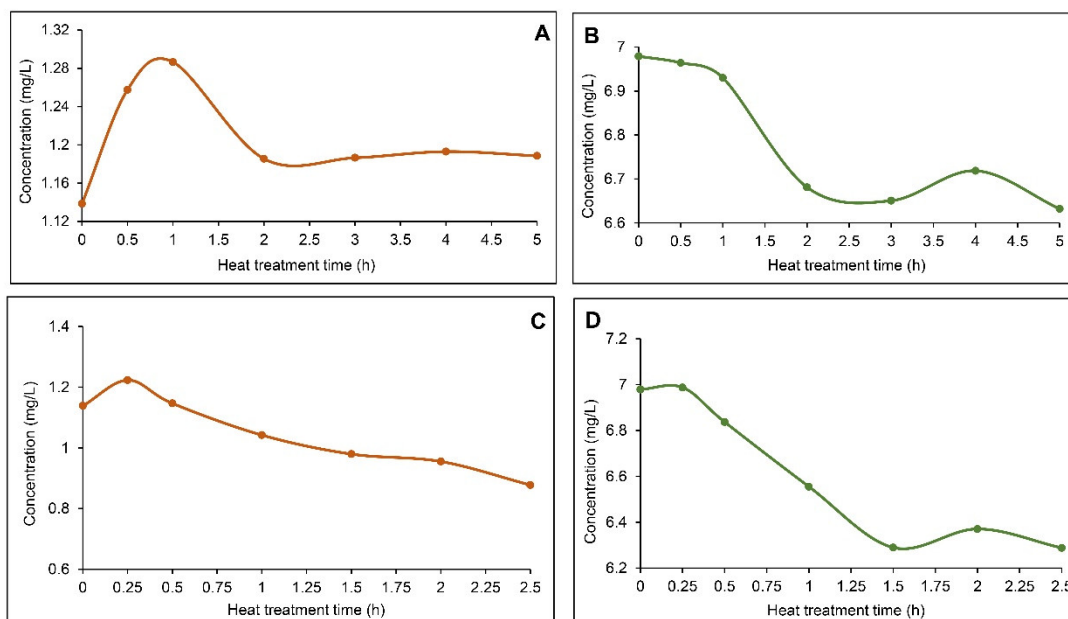

**Figure S1.** Changes in the content of ECG produced in EGCG system solution during heat treatment. **(A)** 100  $\mu$ M of EGCG, heat treatment of 70°C; **(B)** 500  $\mu$ M of EGCG, heat treatment of 70°C; **(C)** 100  $\mu$ M of EGCG, heat treatment of 90°C; **(D)** 500  $\mu$ M of EGCG, heat treatment of 90°C. Each point shown in the graph represents the mean of at least three replicates of a single treatment.

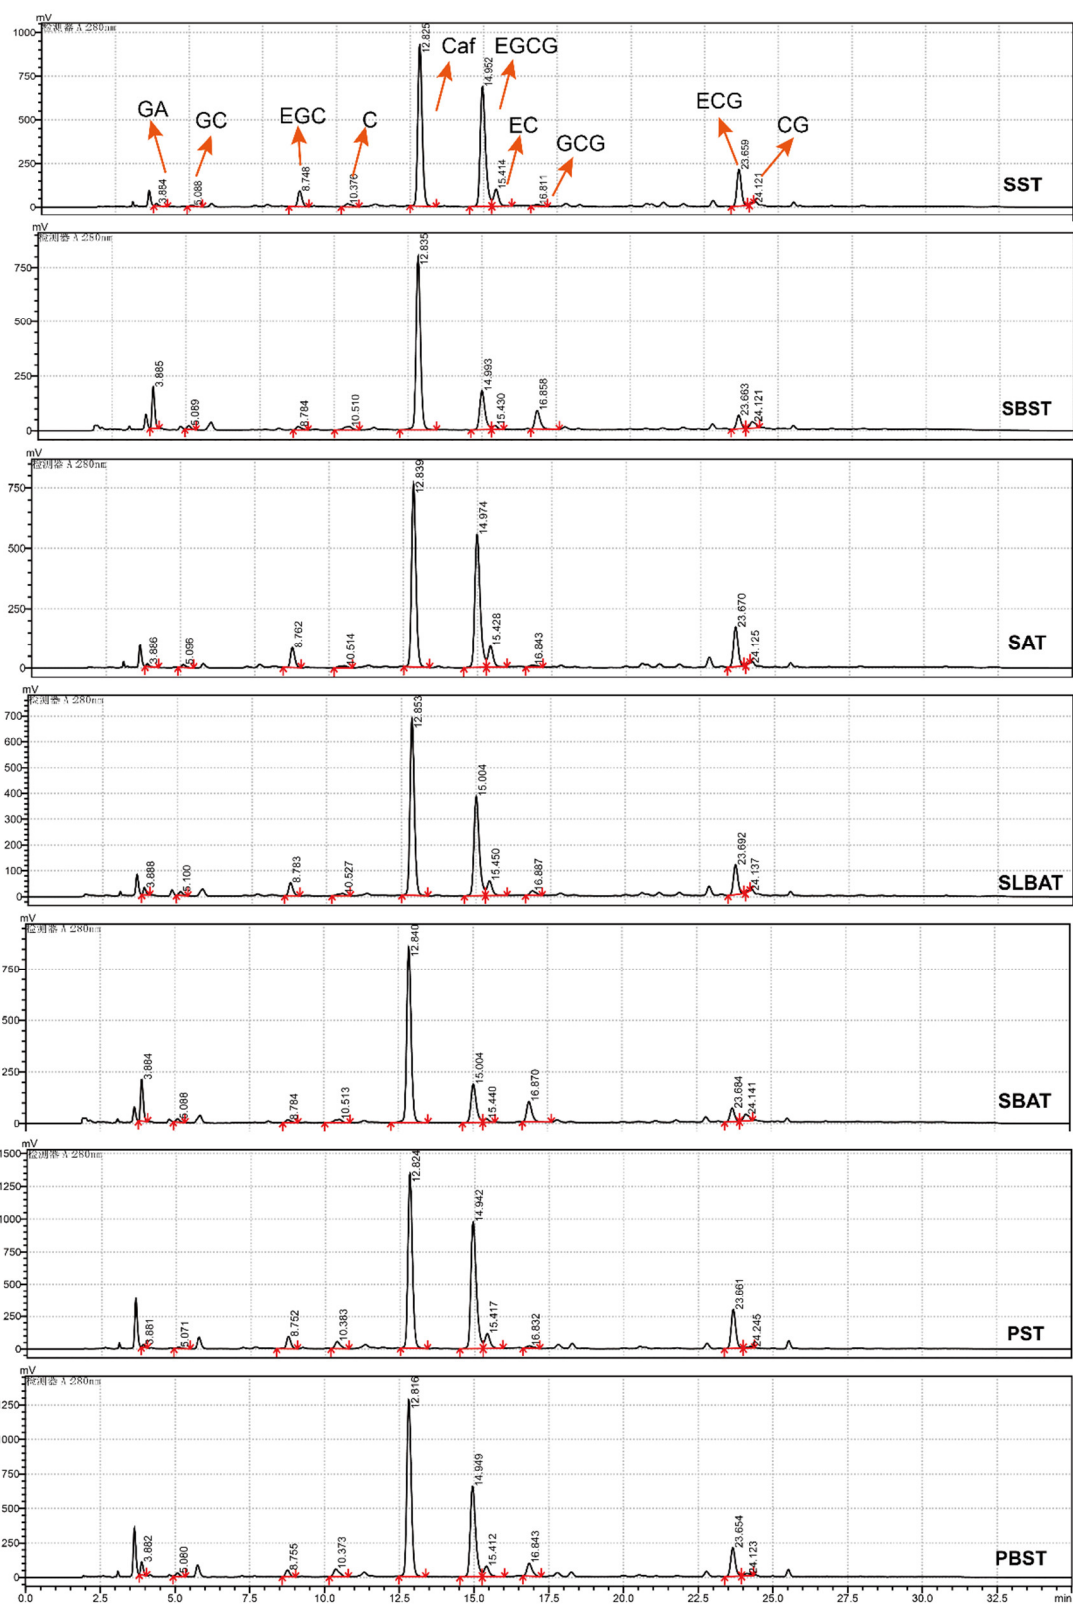

**Figure S2.** HPLC chromatograms of catechin fraction of green tea with different baking processes.
